# Supplementary material for: Associations of Women’s Empowerment and Intimate Partner Violence with Mental Health Among Ever-Married Women in Bangladesh
Source: Research Square preprint supplement (doi:10.21203/rs.3.rs-7473860/v1), 2025-09-11
Supplement: Supplementary file 1 [file 8a567c7fcfbf9f77f02e67bb.docx]

**Supplementary Table S1: Descriptive Statistics with Chi-square and p-values**

1

**Anxiety (GAD-7** *≥***10) Depression (PHQ-9** *≥***10)**

| **Variable** | No n (%) | Yes n (%) | *χ*2 (p-value) |  | No n (%) | Yes n (%) | *χ*2 (p-value) |  |
| --- | --- | --- | --- | --- | --- | --- | --- | --- |
| **IPV Justification**  Does not justify | 15,843 (87.0) | 658 (84.4) | **4.64** ( **0.031*** ) |  | 15,723 (87.0) | 778 (85.0) | 2.98 ( 0.084 ) |  |
| Justifies | 2,364 (13.0) | 122 (15.6) |  |  | 2,349 (13.0) | 137 (15.0) |  |  |
| **Employment Level** |  |  |  |  |  |  |  |  |
| No | 4,347 (23.9) | 136 (17.4) | **17.20** ( **<0.001***** ) | 4,295 (23.8) | | 188 (20.5) | **5.01** ( **0.025*** ) | |
| Yes | 13,860 (76.1) | 644 (82.6) |  | 13,777 (76.2) | | 727 (79.5) |  | |
| **Age Group** |  |  |  |  |  |  |  |  |
| 15-19 | 1,569 (8.6) | 34 (4.4) | **67.95** ( **<0.001***** ) | 1,548 (8.6) | | 55 (6.0) | **41.33** ( **<0.001***** ) | |
| 20-24 | 3,065 (16.8) | 82 (10.5) |  | 3,036 (16.8) | | 111 (12.1) |  | |
| 25-29 | 3,317 (18.2) | 123 (15.8) |  | 3,286 (18.2) | | 154 (16.8) |  | |
| 30-34 | 3,155 (17.3) | 144 (18.5) |  | 3,137 (17.4) | | 162 (17.7) |  | |
| 35-39 | 3,026 (16.6) | 159 (20.4) |  | 3,017 (16.7) | | 168 (18.4) |  | |
| 40-44 | 2,232 (12.3) | 119 (15.3) |  | 2,221 (12.3) | | 130 (14.2) |  | |
| 45-49 | 1,843 (10.1) | 119 (15.3) |  | 1,827 (10.1) | | 135 (14.8) |  | |
| **Education**  No/Primary | 6,947 (38.2) | 378 (48.5) | **39.96** ( **<0.001***** ) | 6,901 (38.2) | | 424 (46.3) | **28.96** ( **<0.001***** ) | |
| Secondary | 8,481 (46.6) | 327 (41.9) |  | 8,416 (46.6) | | 392 (42.8) |  | |
| Higher | 2,779 (15.3) | 75 (9.6) |  | 2,755 (15.2) | | 99 (10.8) |  | |
| **Number of Children** |  |  |  |  |  |  |  |  |
| None | 1,944 (10.7) | 62 (8.0) | **46.80** ( **<0.001***** ) | 1,918 (10.6) | | 88 (9.6) | **20.99** ( **<0.001***** ) | |
| 1-2 | 10,801 (59.3) | 395 (50.6) |  | 10,710 (59.3) | | 486 (53.1) |  | |
| 3+ | 5,462 (30.0) | 323 (41.4) |  | 5,444 (30.1) | | 341 (37.3) |  | |
| **Currently Pregnant** |  |  |  |  |  |  |  |  |
| No/Unsure | 17,076 (93.8) | 739 (94.7) | 1.18 ( 0.278 ) | 16,956 (93.8) | | 859 (93.9) | 0.00 ( 0.946 ) | |
| Yes | 1,131 (6.2) | 41 (5.3) |  | 1,116 (6.2) | | 56 (6.1) |  | |
| **Residing with Partner** |  |  |  |  |  |  |  |  |
| No | 2,770 (15.2) | 116 (14.9) | 0.07 ( 0.794 ) | 2,764 (15.3) | | 122 (13.3) | 2.60 ( 0.107 ) | |
| Yes | 15,437 (84.8) | 664 (85.1) |  | 15,308 (84.7) | | 793 (86.7) |  | |

2

| **Variable** | No n (%) | Yes n (%) | *χ*2 (p-value) |  | No n (%) | Yes n (%) | *χ*2 (p-value) |  |
| --- | --- | --- | --- | --- | --- | --- | --- | --- |
| **Menstruated Last 6 Weeks**  No | 5,470 (30.0) | 294 (37.7) | **20.70** ( **<0.001***** ) |  | 5,433 (30.1) | 331 (36.2) | **15.39** ( **<0.001***** ) |  |
| Yes | 12,737 (70.0) | 486 (62.3) |  |  | 12,639 (69.9) | 584 (63.8) |  |  |
| **Currently Abstaining** |  |  |  |  |  |  |  |  |
| No | 17,519 (96.2) | 752 (96.4) | 0.07 ( 0.786 ) | 17,392 (96.2) | | 879 (96.1) | 0.07 ( 0.790 ) | |
| Yes | 688 (3.8) | 28 (3.6) |  | 680 (3.8) | | 36 (3.9) |  | |
| **Number of Unions** |  |  |  |  |  |  |  |  |
| Once | 17,607 (96.7) | 748 (95.9) | 1.51 ( 0.218 ) | 17,484 (96.7) | | 871 (95.2) | **6.55** ( **0.011*** ) | |
| More than once | 600 (3.3) | 32 (4.1) |  | 588 (3.3) | | 44 (4.8) |  | |
| **Health Card** |  |  |  |  |  |  |  |  |
| No | 17,952 (98.6) | 770 (98.7) | 0.08 ( 0.782 ) | 17,820 (98.6) | | 902 (98.6) | 0.00 ( 0.947 ) | |
| Yes | 255 (1.4) | 10 (1.3) |  | 252 (1.4) | | 13 (1.4) |  | |
| **Pressure to Pregnant** |  |  |  |  |  |  |  |  |
| No | 17,687 (97.1) | 713 (91.4) | **82.07** ( **<0.001***** ) | 17,560 (97.2) | | 840 (91.8) | **83.63** ( **<0.001***** ) | |
| Yes | 520 (2.9) | 67 (8.6) |  | 512 (2.8) | | 75 (8.2) |  | |
| **Husband Fertility Preference** |  |  |  |  |  |  |  |  |
| Fewer | 563 (3.1) | 31 (4.0) | 2.73 ( 0.098 ) | 555 (3.1) | | 39 (4.3) | **4.42** ( **0.036*** ) | |
| Same/More | 16,229 (89.1) | 655 (84.0) |  | 16,091 (89.0) | | 793 (86.7) |  | |
| Missing | 1,415 (7.8) | 94 (12.0) |  | 1,426 (7.9) | | 83 (9.1) |  | |
| **Contraceptive Decision** |  |  |  |  |  |  |  |  |
| Husband/Other | 1,871 (10.3) | 63 (8.1) | **3.95** ( **0.047*** ) | 1,846 (10.2) | | 88 (9.6) | 0.34 ( 0.560 ) | |
| Respondent | 16,336 (89.7) | 717 (91.9) |  | 16,226 (89.8) | | 827 (90.4) |  | |
| **Area** |  |  |  |  |  |  |  |  |
| Urban | 6,364 (35.0) | 258 (33.1) | 1.16 ( 0.282 ) | 6,324 (35.0) | | 298 (32.6) | 2.26 ( 0.133 ) | |
| Rural | 11,843 (65.0) | 522 (66.9) |  | 11,748 (65.0) | | 617 (67.4) |  | |
| **Division**  Barishal | 1,961 (10.8) | 72 (9.2) | **50.55** ( **<0.001***** ) | 1,946 (10.8) | | 87 (9.5) | **70.06** ( **<0.001***** ) | |
| Chattogram | 2,687 (14.8) | 134 (17.2) |  | 2,707 (15.0) | | 114 (12.5) |  | |
| Dhaka | 2,772 (15.2) | 99 (12.7) |  | 2,751 (15.2) | | 120 (13.1) |  | |
| Khulna | 2,339 (12.8) | 139 (17.8) |  | 2,315 (12.8) | | 163 (17.8) |  | |
| Mymensingh | 1,990 (10.9) | 61 (7.8) |  | 1,980 (11.0) | | 71 (7.8) |  | |
| Rajshahi | 2,376 (13.0) | 63 (8.1) |  | 2,356 (13.0) | | 83 (9.1) |  | |

3

| **Variable** | No n (%) | Yes n (%) | *χ*2 (p-value) |  | No n (%) | Yes n (%) | *χ*2 (p-value) |  |
| --- | --- | --- | --- | --- | --- | --- | --- | --- |
| Rangpur | 2,185 (12.0) | 113 (14.5) |  |  | 2,140 (11.8) | 158 (17.3) |  |  |
| Sylhet | 1,897 (10.4) | 99 (12.7) |  |  | 1,877 (10.4) | 119 (13.0) |  |  |
| **Religion**  Non-Muslim | 1,924 (10.6) | 48 (6.2) | **15.65** ( **<0.001***** ) |  | 1,904 (10.5) | 68 (7.4) | **9.02** ( **0.003**** ) |  |
| Muslim | 16,283 (89.4) | 732 (93.8) |  |  | 16,168 (89.5) | 847 (92.6) |  |  |
| **Wealth Category** |  |  |  |  |  |  |  |  |
| Poor | 6,784 (37.3) | 300 (38.5) | 1.14 ( 0.565 ) | 6,716 (37.2) | | 368 (40.2) | **9.64** ( **0.008**** ) | |
| Middle | 3,625 (19.9) | 161 (20.6) |  | 3,585 (19.8) | | 201 (22.0) |  | |
| Rich | 7,798 (42.8) | 319 (40.9) |  | 7,771 (43.0) | | 346 (37.8) |  | |
| **Household Size**  1-3 members | 3,954 (21.7) | 176 (22.6) | 0.32 ( 0.574 ) | 3,909 (21.6) | | 221 (24.2) | 3.26 ( 0.071 ) | |
| 4+ members | 14,253 (78.3) | 604 (77.4) |  | 14,163 (78.4) | | 694 (75.8) |  | |
| **Household Head Sex** |  |  |  |  |  |  |  |  |
| Male | 16,000 (87.9) | 684 (87.7) | 0.02 ( 0.876 ) | 15,873 (87.8) | | 811 (88.6) | 0.53 ( 0.469 ) | |
| Female | 2,207 (12.1) | 96 (12.3) |  | 2,199 (12.2) | | 104 (11.4) |  | |
| **Currently Working** |  |  |  |  |  |  |  |  |
| No | 12,754 (70.0) | 527 (67.6) | 2.20 ( 0.138 ) | 12,648 (70.0) | | 633 (69.2) | 0.27 ( 0.604 ) | |
| Yes | 5,453 (30.0) | 253 (32.4) |  | 5,424 (30.0) | | 282 (30.8) |  | |
| **Father’s Education** |  |  |  |  |  |  |  |  |
| No education | 2,293 (12.6) | 140 (17.9) | **40.26** ( **<0.001***** ) | 2,267 (12.5) | | 166 (18.1) | **39.39** ( **<0.001***** ) | |
| Primary incomplete | 2,269 (12.5) | 119 (15.3) |  | 2,273 (12.6) | | 115 (12.6) |  | |
| Primary complete | 2,448 (13.4) | 120 (15.4) |  | 2,424 (13.4) | | 144 (15.7) |  | |
| Secondary | 6,371 (35.0) | 251 (32.2) |  | 6,315 (34.9) | | 307 (33.6) |  | |
| Higher | 4,826 (26.5) | 150 (19.2) |  | 4,793 (26.5) | | 183 (20.0) |  | |

**Note: Percentages are row percentages. IPV = Intimate Partner Violence.**

***p < 0.05, **p < 0.01, ***p <0.001**
